# Supplementary material for: Laparoscopic Sleeve Gastrectomy Resolves Low GHRP-2-Stimulated Growth Hormone Levels in Obese Patients
Source: Springer Nature journal article supplement (doi:10.1007/s11695-017-2769-4), 2017-06-16
Supplement: MOESM3 [file 12450422]

|  | β | SE(β) | Std. β | p |
| --- | --- | --- | --- | --- |
|  | 119.30 | 22.80 | 0 |  |
| BMI | -2.09 | 0.55 | -0.73 | 0.002 |

Supplemental Table 2. Stepwise multiple linear regression analysis to determine the best model to predict GH secretion peaks
